1 Stuck in the weeds: Invasive grasses reduce tiger snake movement

2 **Authors**

3 Jari Cornelis<sup>1\*</sup>, Christine E Cooper<sup>1</sup>, Damian C Lettoof<sup>1,2</sup>, Martin Mayer<sup>3,4</sup>, Benjamin M Marshall<sup>5</sup>

4 **Affiliations**

5 <sup>1</sup>School of Molecular and Life Sciences, Curtin University, Western Australia

6 <sup>2</sup>Environment, Commonwealth Scientific and Industrial Research Organisation (CSIRO), Floreat,  
7 Western Australia

8 <sup>3</sup>Department of Forestry and Wildlife Management, Inland Norway University of Applied Sciences,  
9 Anne Evenstads Vei 80, 2480 Koppang, Norway

10 <sup>4</sup>Department of Natural Sciences and Environmental Health, University of South-Eastern Norway, Bø  
11 i Vestfold and Telemark, Norway

12 <sup>5</sup>Biological and Environmental Sciences, Faculty of Natural Sciences, University of Stirling, Stirling,  
13 United Kingdom

14

15 **Corresponding author email**

16 [\\*jari.cornelis@gmail.com](mailto:jari.cornelis@gmail.com)

17

18 **Keywords:** home range, invasive species, movement ecology, *Notechis scutatus*, plants

19

20 **ABSTRACT**

21 Wetlands are particularly vulnerable to degradation in urban environments, partially due to the  
22 introduction of non-native plants. Invasive weeds in wetlands can replace native plants leading to  
23 alterations in habitat composition and vegetation, in turn, animal movements and ultimately  
24 population dynamics might be affected. Here we investigate how home range size and movements of  
25 western tiger snakes (*Notechis scutatus occidentalis*) differ in wetlands dominated by invasive kikuyu  
26 grass (*Cenchrus clandestinus*) compared to wetlands dominated by native vegetation to understand if  
27 and how the movement ecology of this top-order predator is altered by vegetation homogenization. To  
28 do so, we used Autocorrelated Kernel Density Estimators (AKDE) to estimate home range size,  
29 dynamic Brownian Bridge Movement Models to document movement trajectory confidence areas,  
30 and compared movement distances using a Bayesian regression model. Home range sizes by tiger  
31 snakes were  $14.59 \pm 9.35$  ha smaller in areas dominated by invasive versus native vegetation.  
32 Moreover, within-day movement distances tended to be smaller in areas dominated by invasive versus  
33 native vegetation (mean  $\pm$  SD:  $9 \pm 3$  m versus  $18 \pm 6$  m), but there was considerable overlap between  
34 the 95% credible intervals between these two groups. Smaller home ranges by tiger snakes in areas  
35 dominated by invasive kikuyu grass were likely driven by thermoregulation, with snakes moving  
36 vertically between basking locations on top of kikuyu and shelter sites at the base, rather than  
37 travelling horizontally along the ground to open basking areas in sites dominated by native vegetation.  
38 Additionally, fragmentation of sites dominated by invasive vegetation might have contributed to the  
39 comparatively smaller home ranges of snakes there. These findings add to our understanding how  
40 changes in habitat composition driven by invasive vegetation can affect animal space use and  
41 emphasise the need for further studies to understand how these changes affect population dynamics.

## 42 INTRODUCTION

43 Wetlands are sensitive ecosystems and are particularly vulnerable to degradation in urban  
44 environments (Faulkner 2004). Invasive weed species in wetlands (Grella et al. 2018) can replace  
45 native plant species, causing compositional and structural changes to the vegetation (Braithwaite et al.  
46 1989; Reed et al. 2005). Habitat homogenisation by invasive plants can alter the structural complexity  
47 of microhabitats (Lambdon et al. 2008; Cornelis et al. 2022) and the availability of resources for  
48 animals (Schirmel et al. 2016) including the thermal quality of the vegetation (Hacking et al. 2015)  
49 and opportunities for camouflage (Valentine et al. 2007). Moreover, structural components of the  
50 vegetation can make mobility (Newbold 2005) and foraging (Maerz et al. 2005) more difficult, which  
51 can impact animal movement and behaviour (Doherty et al. 2019, Stewart et al. 2021). Consequently,  
52 invasive weeds can affect animal populations and communities. For example, habitat homogenisation  
53 by invasive cheatgrass (*Bromus tectorum*) in North America led to changes in small mammal  
54 community composition by increasing harvest mouse (*Rithrodontomys* spp.) and decreasing pocket  
55 mouse (*Perognathus* spp.) occupancy (Ceradini & Chalfoun 2017).

56

57 Species that rely on specific microhabitats and thermal conditions might be impacted most by the  
58 cumulative impacts of invasive plants (Devictor et al. 2008; Clavel et al. 2011). However, not all  
59 fauna are negatively affected by the invasion of exotic plants (Douglas et al. 2006). Some reptiles, for  
60 example, are more reliant on the structure provided by vegetation rather than the composition or  
61 species diversity, including invasive species, of the plant community (Garden et al. 2007; Hodgkinson  
62 et al. 2007; Garden et al. 2010). Some vegetation monocultures can provide favourable conditions for  
63 these species where they can persist, and even thrive, despite the predominance of a single invasive  
64 species (Lettoof et al 2021b). How animals react to differences in vegetation composition can be  
65 revealed through examining animal movement thereby providing an avenue to connect the impacts of  
66 vegetation and land use management decisions (Fraser et al., 2018). Consequently, investigating  
67 animal movement in weed-infested landscapes can lead to better informed management outcomes  
68 (Doherty and Driscoll 2018).

69

70 Western tiger snakes (*Notechis scutatus occidentalis*) persist in a handful of urban wetlands in Perth,  
71 Western Australia, a region where ~70% of wetlands have been lost or degraded (Davis and Froend  
72 1999; Kelobonye et al. 2019). The predatory role of tiger snakes in these wetlands (Lettoof et al.  
73 2020) and evidence of their bioaccumulation of environmental contaminants make these snakes  
74 potentially useful bioindicators of urban wetland health (Lettoof et al. 2021). Many of Perth's urban  
75 wetlands have lost their original riparian vegetation and are instead dominated by invasive flora  
76 (Davis and Froend 1999; Simpson and Newsome 2016) including kikuyu grass (*Cenchrus*  
77 *clandestinus*). Kikuyu grows as a dense matrix of stems, which facilitates its colonisation and can  
78 result in native plant communities being transformed into a monoculture of kikuyu (Gonzalez 2009;  
79 Bradshaw et al. 2013). The inter-plant distance of invasive grasses is often lower compared to native  
80 grasses, reducing the amount of bare ground that, together with limited plant diversity, results in  
81 reduced environmental heterogeneity (Litt and Steidl 2011; Lindsay and Cunningham 2012, Abom et  
82 al. 2015). Consequently, increased vegetation density and reduced availability of bare ground are two  
83 key structural features of kikuyu grass that differentiates it from the native riparian grass/tussock  
84 vegetation that occurs naturally in these wetlands (Cornelis et al. 2022).

85

86 Here we assess whether movements of western tiger snakes differ in wetlands dominated by invasive  
87 kikuyu grass compared to wetlands characterised by native vegetation. Our comparison aims to reveal  
88 if and how the movement ecology of this predatory species is altered by human-driven vegetation  
89 homogenization. We evaluated the potential effect of invasive kikuyu grass on tiger snake home range  
90 size (autocorrelated kernel density estimators; AKDE), movement trajectory confidence areas  
91 (dynamic Brownian bridge movement models; dBBMM), and compared step lengths per hour (using  
92 a Bayesian regression model) to gain insight into how tiger snakes may modify their movement in  
93 areas heavily affected by invasive vegetation.

94

## 95 MATERIALS AND METHODS

### 96 *Study sites*

97 We examined western tiger snake spatial ecology at four wetlands within 50km of the Perth CBD,  
98 Western Australia (Fig.1). Herdsman Lake (HS; 31.92°S, 115.80°E) and Kogolup Lake (KL; 32.12°S,  
99 115.83°E) is dominated by invasive kikuyu grass. Loch McNess in Yanchep National Park (Y;  
100 31.54°S, 115.68°E) and Black Swan Lake (BS; 32.47°S, 115.77°E) are dominated by native  
101 vegetation, predominantly *Schoenoplectus spp* in open habitats; *Ghania decomposita* and  
102 *Lepidosperma longitudinale* in sedgelands close to water; and *Banksia*, *Melaleuca* and *Eucalyptus spp*  
103 in woodlands (Cornelis et al. 2022; Fig. 1). For each site we measured the area (ha) of three land  
104 cover variables within 200m of the water's edge (the greatest distance a snake travelled from the  
105 water) or less if there was a major barrier (e.g., building or roads) using QGIS v. 3.10.14 and ESRI  
106 satellite imaging after Lettoof et al. (2022). These variables were: total area, snake habitat (vegetation  
107 that contains mid-to-understory layers that tiger snakes could shelter in), and the percent of the snake  
108 habitat that was composed of kikuyu grass.

109

110 Of the total 322.5 ha area of the HL reserve an area of 49.1ha (15%) was potentially suitable for tiger  
111 snakes, and the remainder was mowed lawn or open water. Kikuyu grass dominated 61% of this  
112 potential tiger snake habitat, with the remainder native vegetation dominated by bulrush (*Typha sp*;  
113 Fig. 1). Kogolup Lake reserve total area was 68 ha area, with 54.2 ha (80%) potentially suitable for  
114 tiger snakes. Snakes were only caught around the northern half of Kogolup Lake, so we only  
115 measured this area of the wetland. Of this potential tiger snake habitat, 49% was dominated by kikuyu  
116 grass. The remaining native vegetation was dominated by *Eucalyptus*, *Melaleuca* and/or *Banksia spp*  
117 (Fig. 1).

118

119 There was no introduced kikuyu grass in potential tiger snake habitat at BS or Y lakes, with 40.5ha  
120 (69%) of the total 59 ha reserve native vegetation potentially suitable for tiger snakes at BS and 50.1  
121 ha (80%) available of the total 62.8 ha area at Y (Fig. 1).

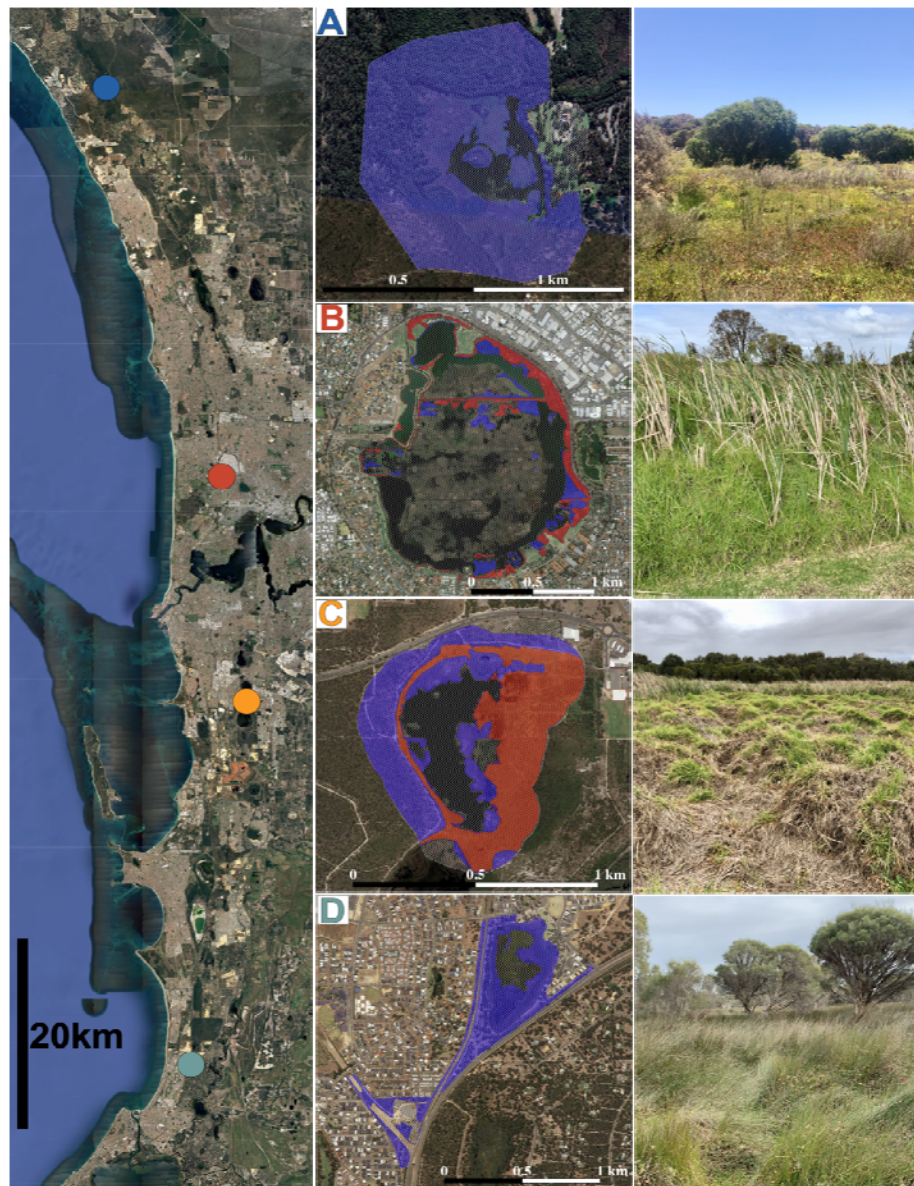

122

123 Fig. 1. *Left panel*: The Perth metropolitan area, Western Australia with our four wetland *study sites*.

124 Warmer colours (Herdsman Lake and Kogolup Lake) are sites dominated by invasive kikuyu grass

125 (*Cenchrus clandestinus*) and cooler colours (Black Swan Lake and Yanchep National Park) are the

126 sites with native vegetation. *Center panel*: Area of potential western tiger snake (*Notechis scutatus*

127 *occidentalis*) habitat dominated by native (blue hashed) or introduced kikuyu grass (*Cenchrus*

128 *clandestinus*; red hashed) at A) Yanchep National Park, B) Herdsman Lake, C) Kogolup Lake and D)

129 Black Swan Lake. *Right Panel*: Representative habitat where tiger snakes spent the majority of their

130 time during the tracking period corresponding to the site on the left of each image. Map Data:

131 Imagery ©2022 Google, Imagery ©2022 CNES / Airbus, Maxar Technologies.

132 ***Field methods: Capture, morphometrics and radio tracking***

133 Adult male tiger snakes were hand-captured in September when they emerged from their overwinter-  
134 dormancy (Shine 1977; 1979). Only sexually mature male snakes (>650mm; Shine 1978) were  
135 studied as they are physically larger (to facilitate instrumentation) and are likely to be more active  
136 while searching for mates than females and juveniles (Shine 1979; Bonnet et al., 1999; Carfagno and  
137 Weatherhead, 2008). Their capture location was recorded with a Garmin (model 60) GPS. Snakes  
138 were weighed using a 500g Pesola spring balance, snout-vent length (SVL) and tail length were  
139 measured by stretching the snake along a ruler, and ventral scale clips were made for individual  
140 identification. The mean snout-vent-length of the 14 snakes was  $84.6 \pm 1.51$ cm (range 72.8–96.0cm)  
141 and mass  $294.46 \pm 15.21$  g (207.5–427.5; Table 1). We ran ANOVAs on these measurements and  
142 determined that vegetation (native or kikuyu) had no effect on snake SVL or mass ( $p > 0.173$ ). Sex  
143 was determined by inserting a lubricated probe into the cloacal bursae to measure the depth of the  
144 hemipenal pocket (McDiarmid et al. 2012). Fourteen snakes (Table 1) were transported to Curtin  
145 University campus where they were housed individually in plastic tubs (70x50x40cm) for up to a  
146 week prior to surgery, and then 2-5 days post-surgery to facilitate welfare monitoring. The snakes  
147 were not fed during the < two weeks they were in captivity, but fresh water was provided *ad lib*.

148

149

150

151

152

153 Table 1. Measurement and tracking data for individual tiger snakes (*Notechis scutatus occidentalis*)  
 154 studied at four wetlands (HL, Herdsman Lake; KL, Kogolup Lake; BS, Black Swan Lake; Y,  
 155 Yanchep National Park) in the Perth metropolitan area, Western Australia. A standard error  
 156 accompanies mean values. Naive mean move distance is calculated using all step lengths, whereas  
 157 daily mean move distance is calculated using step lengths where the tracking time lag was less than 24  
 158 hours.

| Snake ID | Snout-vent length (mm) | Mass (g) | Duration tracked (days) | Number of tracks | Median tracking time lag (hr) | Mean tracking time lag (hrs) | Number of moves | Naive mean move distance (m) | Daily mean move distance (m) |
|----------|------------------------|----------|-------------------------|------------------|-------------------------------|------------------------------|-----------------|------------------------------|------------------------------|
| HL162    | 805                    | 260      | 51                      | 53               | 2.99                          | 23.65 ± 4.98                 | 52              | 18.8 ± 2.2                   | 16.9 ± 2.6                   |
| HL166    | 855                    | 332.5    | 52                      | 53               | 2.99                          | 24.02 ± 5.06                 | 52              | 10.9 ± 2.3                   | 8.0 ± 2.1                    |
| HL168    | 804                    | 255      | 32                      | 36               | 3.02                          | 22.17 ± 5.96                 | 35              | 5.2 ± 1.2                    | 3.9 ± 0.4                    |
| HL88     | 804                    | 247.5    | 52                      | 47               | 3.06                          | 27.13 ± 5.69                 | 46              | 51.8 ± 28.8                  | 12.4 ± 2.4                   |
| KL01     | 852                    | 290      | 48                      | 49               | 2.98                          | 23.97 ± 5.27                 | 48              | 17.8 ± 3.8                   | 11.4 ± 3.2                   |
| KL02     | 812                    | 270      | 48                      | 50               | 3.02                          | 23.73 ± 5.16                 | 49              | 12.0 ± 2.1                   | 11.0 ± 2.4                   |
| KL06     | 844                    | 260      | 32                      | 35               | 3.01                          | 22.79 ± 6.12                 | 34              | 6.5 ± 1.8                    | 5.1 ± 2.0                    |
| BS01     | 872                    | 277.5    | 48                      | 52               | 2.93                          | 22.75 ± 5.02                 | 51              | 62.9 ± 11.8                  | 31.6 ± 6.0                   |
| BS02     | 895                    | 310      | 48                      | 52               | 2.98                          | 22.77 ± 5.01                 | 51              | 12.9 ± 2.6                   | 7.0 ± 1.5                    |
| BS08     | 906                    | 357.5    | 48                      | 49               | 2.94                          | 24.01 ± 5.29                 | 48              | 92.9 ± 25.8                  | 46.5 ± 16.2                  |
| BS09     | 960                    | 427.5    | 55                      | 30               | 3                             | 45.51 ± 18.9                 | 29              | 97.6 ± 25.2                  | 37.9 ± 9.1                   |
| Y58      | 880                    | 355      | 32                      | 36               | 2.97                          | 22.16 ± 6.01                 | 35              | 12.8 ± 3.4                   | 9.7 ± 1.5                    |
| Y63      | 728                    | 207.5    | 48                      | 50               | 2.97                          | 23.7 ± 5.23                  | 49              | 25.5 ± 5.2                   | 17.3 ± 3.8                   |
| Y65      | 829                    | 272.5    | 51                      | 53               | 3                             | 23.61 ± 5                    | 52              | 34.35 ± 5.59                 | 18.1 ± 2.9                   |

159

160



161 A wax-coated (Elvax) VHF transmitter (Holohil PD-2; total mass ~5g, <3% of the snakes' body  
162 mass), was surgically implanted into the intraperitoneal cavity of each of the 14 snakes under general  
163 anaesthesia. Anaesthesia was induced by an intramuscular injection of Alfaxalone (5 mg kg<sup>-1</sup>) and  
164 maintained with gaseous isoflurane (1.5-4%) in oxygen. Local anaesthetic (lignocaine, 1 mg kg<sup>-1</sup> and  
165 bupivacaine, 1 mg kg<sup>-1</sup>) was administered subcutaneously at the surgical site. The transmitter was  
166 inserted into the peritoneal cavity with the transmitter's whip antenna inserted into a pocket under the  
167 skin. Analgesia was provided in the form of a subcutaneous injection of Meloxicam (0.2 mg kg<sup>-1</sup>).

168

169 Two to five days after surgery snakes were released at their point of capture. They were then radio-  
170 tracked for a maximum of two months during the period 12<sup>th</sup> October 2020 to 3<sup>rd</sup> December 2020.  
171 Due to the distance between study sites snakes could only be tracked at one site per day. We visited  
172 each site sequentially every four days and at each site we tracked individual snakes four times per day  
173 to determine their location, with approximately three hours between each location recording. Some  
174 snakes were collected before the two month period as their transmitter battery began to expire. Snakes  
175 were recaptured by hand and returned to Curtin University where they were euthanised via an  
176 intracardiac injection of Lethabarb (pentobarbitone 162.5 mg kg<sup>-1</sup>) and then dissected to remove the  
177 transmitter.

178

### 179 *Analysis: Space use estimates and comparing areas and movement*

180 We estimated tiger snake home ranges using autocorrelated kernel density estimators (AKDE;  
181 Fleming & Calabrese, 2017), with the ctmm package (v.0.6.1; Calabrese et al. 2016) for R v.4.2.0.  
182 There are several advantages of AKDE over other estimators of home range (e.g., minimum convex  
183 polygon, kernel density estimators). Autocorrelated kernel density estimators use a fitted movement  
184 model to better estimate the potential locations an animal would travel, thereby fitting more closely to  
185 Burt's (1943) definition of home range than movement-naïve traditional methods (Fleming &  
186 Calabrese, 2017). Autocorrelated kernel density estimators are also more robust for data with  
187 temporal gaps and they address the autocorrelation inherent in tracking data (Fleming et al. 2018;  
188 Noonan et al. 2019). We used perturbative hybrid REML (pHREML) to fit and determine the best

189 fitting movement model for each individual –pHREML is well-suited for datasets with small effective  
190 sample sizes (Silva et al. 2021). We selected the model with the lowest AICc for each individual, and  
191 used the weighted 95% contour area estimates from that lowest AICc model in all further analysis.  
192 We used weighted estimates because of the gaps in data collection (Silva et al. 2021). Range stability,  
193 and therefore suitability for home range area estimation, was assessed with variograms. Values are  
194 presented as mean  $\pm$  SD unless stated otherwise.

195

196 Autocorrelated kernel density estimators provide an estimate of animal's home range, but due to the  
197 questionable stability of the ranges observed we supplemented these estimates with dynamic  
198 Brownian bridge movement models (dBBMM; Kranstauber et al., 2012; Kranstauber et al., 2022).  
199 Dynamic Brownian bridge movement models estimate the uncertainty surrounding movement  
200 pathways taken between known locations. The area estimates (or confidence areas) that dBBMM  
201 generate are considered an occurrence distribution (i.e., interpolation within a sampling period) that  
202 contrast with the use distributions provided by AKDEs (i.e., extrapolation to a full home range for an  
203 animal; Alston et al., 2022). Here we use dBBMM as a comparison of the potential areas the snakes  
204 could have reached between recorded locations. As we documented snake locations at similar  
205 frequency and durations, the differences in dBBMM confidence areas should reflect differences in  
206 movement rather than uncertainty derived from sampling variation (Silva et al., 2020) providing an  
207 additional line of evidence for any movement differences detected.

208

209 Dynamic Brownian bridge movement models base the estimates of uncertainty on the movement  
210 capacity of the animal (termed motion variance) calculated on a rolling basis from the tracking data  
211 (Kranstauber et al., 2012). The rolling basis is determined by two values, a window size and a margin  
212 size; we selected a large window (29 data points) and a margin likely still capable of detecting  
213 movement mode changes within that window (9 data points). We selected a broad window to mitigate  
214 the burst tracking regime, smoothing out spikes in movement activity that could be artefacts of the  
215 sampling protocol. We retrieved the areas from 90, 95, and 99% confidence area contours, and used

216 the 95% contour in all further analyses. We used the R package *move* (v.4.1.8; Kranstauber et al.,  
217 2022) to run dBBMMs.

218 We compared the area estimates (home range from 95% AKDE and 95% confidence areas from  
219 dBBMM) using Bayesian comparative tests using a student distribution, as these provide more  
220 intuitive estimates of uncertainty with small samples (Morey et al., 2019). We used *brms* v.2.17.0  
221 (Bürkner 2017, 2018, 2021), *bayesplot* v.1.9.0 (Gabry et al. 2019; Gabry and Mahr 2022), *tidybayes*  
222 v.3.0.2 (Kay 2022), and *performance* v.0.9.1 (Lüdecke et al. 2021), to run, visualise and explore these  
223 Bayesian models. For the Markov Chain Monte Carlo (MCMC) chains, we used 24,000 iterations,  
224 with a burn-in of 6,000, across 4 chains, and a thinning factor of 12. We used the resulting  
225 distributions to compare individuals at the sites with vegetation (*vegetation*) dominated by invasive  
226 grass sites (KL and HL) with those inhabiting sites dominated by native vegetation (Y and BS). We  
227 also included study site (*locale*) as a group effect to account for lack of independence between area  
228 estimates. The final formula was  $area\_estimate \sim 0 + vegetation + (1/locale)$ ,  $sigma \sim vegetation$ . To  
229 avoid divergent transitions we increased adaptive delta to 0.9 and maximum tree depth to 15.

230

231 To explore whether the step lengths of individual movements (modelled using a lognormal  
232 distribution) differed based on whether they occupied an area with invasive or native vegetation we  
233 ran a Bayesian regression model. We included a binary population effect for *vegetation* (invasive  
234 versus native), and we included a nested group intercept effect to account for individual snakes  
235 (*snakeID*) and the study site they occurred in (*locale*). As location data were collected using a burst  
236 regime, we excluded all step lengths calculated between tracking days (i.e., no steps with a time lag  
237 greater than 24 hours were included). We accounted for the non-independence between data points  
238 collected on the same day by adding a second group intercept effect based on date. The final model  
239 used to explore invasive grass presence on step lengths per hour was:  $step\_length\_over\_hour \sim 0 +$   
240  $vegetation + (1/locale/snakeID) + (1/date)$ . We ran the model in R using the *brms* package (Bürkner,  
241 2017), using 8,000 iterations, 4 chains, with 4,000 burn-in, and a thinning factor of 2. To ensure  
242 convergence and to minimise divergent transitions (3 could not be prevented), we modified the  
243 maximum tree depth to 15 and the adaptive delta to 0.999. We used uniform priors, limited between 0

244 and 1,000, when exploring the difference between area estimates. We did not supply priors for the  
245 step length Bayesian models, applying the brm package defaults (flat priors for  $\beta$ , student distribution;  
246 degrees of freedom = 3,  $\mu = 0$ ,  $\sigma = 1$  for standard deviations). We determined chain  
247 convergence using  $R^2$  values ( $0.9 < R^2 < 1.1$ ) and reviewed trace, acf and posterior predictive check  
248 plots to check for other model convergence issues.

249

250 For the above analyses we used R v.4.2.0 (R Core Team 2022) via RStudio v.2022.7.1.554 (RStudio  
251 Team 2022). We used the tidyverse v.1.3.1 and reshape2 v.1.4.4 packages for data manipulation  
252 (Wickham et al. 2019; Wickham 2007). We used ggplot2 v.3.3.6 for creating figures (Wickham  
253 2016), with the expansions: ggridges v.0.5.3 (Wilke 2021), ggpubr v.0.4.0 (Kassambara 2020),  
254 ggrepel v.0.9.1 (Slowikowski 2021), and ggspatial v.1.1.6 (Dunnington 2022). We used GADMTTools  
255 v.3.9.1 (Decorps 2021), sp v.1.5.0 (Pebesma and Bivand 2005; R. S. Bivand et al., 2013), and rgeos  
256 v.0.5.9 (Bivand and Rundel 2021) to manipulate spatial data and plot country outlines. We used the  
257 ctm v.0.6.1 to estimate AKDEs (Fleming and Calabrese 2021), and the move v.4.1.8 to estimate  
258 dBBMMs (Kranstauber et al., 2022). We used brms v.2.17.0 (Bürkner 2017, 2018, 2021), bayesplot  
259 v.1.9.0 (Gabry et al. 2019; Gabry and Mahr 2022), tidybayes v.3.0.2 (Kay 2022), and performance  
260 v.0.9.1 (Lüdtke et al. 2021), to run, visualise, and explore Bayesian models. We generated R  
261 package citations with the aid of grateful v.0.1.11 (Rodríguez-Sánchez et al. 2022).

262

## 263 **RESULTS**

### 264 *Capture and tracking summary*

265 We tracked snakes for a mean duration of  $46.1 \pm 2.12$  days (32–55; Fig. S1), collecting an average of  
266  $46.1 \pm 2.16$  data points (30–53) per individual, and recording a mean of  $45.1 \pm 2.16$  moves per snake  
267 (29–52; Table 1). Overall, the burst sampling regime resulted in a mean time lag between data points  
268 of  $24.6 \pm 1.65$  hours (0.77–543.9 hours; Fig. S2), and a median time lag of 3 hours. Mean naive step  
269 length (including step lengths recorded between the bursts of sampling) was  $32.3 \pm 3.49$ m (0.136–  
270 1349m), and mean within-day step length (only steps recorded with a time lag of less than 24 hours)  
271 was  $16.9 \pm 1.59$ m (0.26–542m).

272

273 ***Area use and movement***

274 At the two sites with native vegetation (BS and Y), we mostly observed tiger snakes in areas with  
275 native grasses (*Schoenoplectus* spp), whereas snakes were mostly observed in areas dominated by  
276 kikuyu grass in KL and HL. There was no evidence that the tiger snakes at KL and HL moved from  
277 their kikuyu sites to the adjacent native Banksia woodland during the period they were tracked. We  
278 frequently observed tiger snakes basking on top of the dense structure formed by kikuyu grass at both  
279 HL and KL while snakes at BS and Y were most commonly observed basking in sunny patches on the  
280 ground rather than on top of the vegetation (Fig. 2).

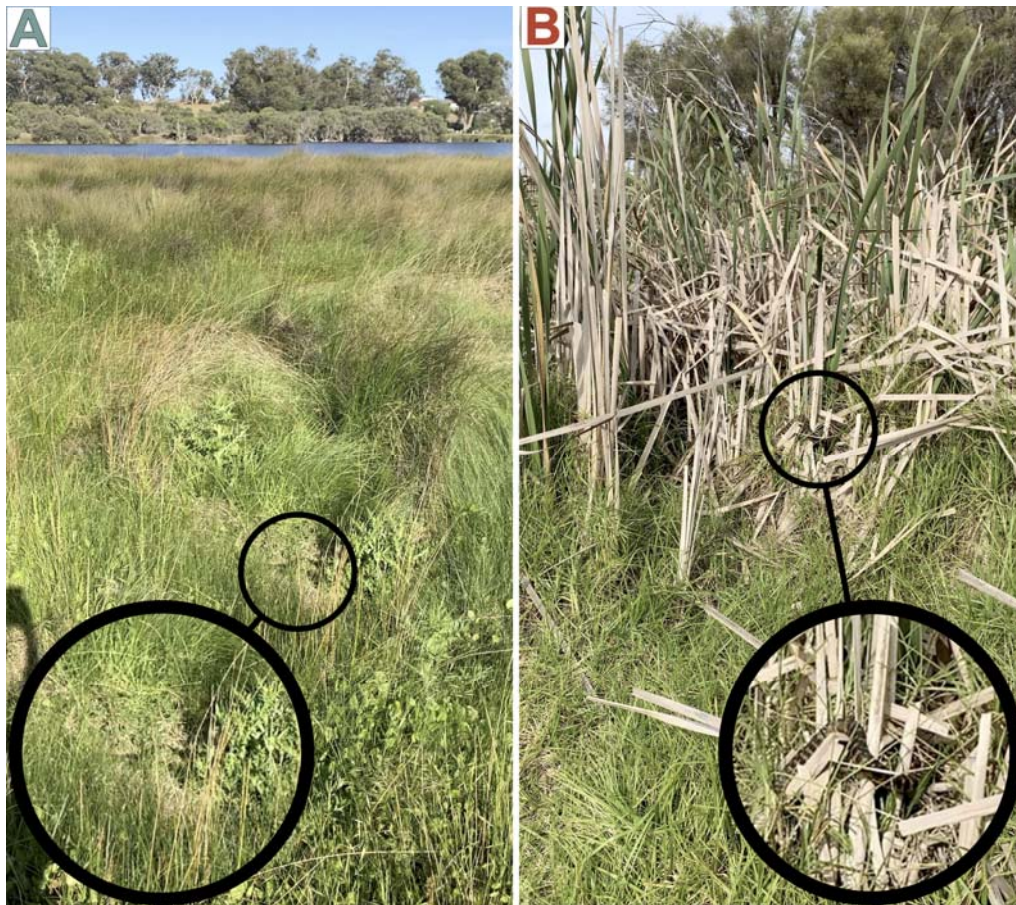

281

282 Fig. 2. Two examples (including magnified insets in large circles) of how tiger snakes (*Notechis*  
283 *scutatus occidentalis*) were most commonly observed basking in (A) native vegetation at Black Swan  
284 Lake where the tiger snakes basked in sunny patches on the ground while in (B) invasive kikuyu grass  
285 at Herdsman Lake tiger snakes basked in elevated positions provided by the dense structure of kikuyu.  
286

287 The 95% AKDE contours produced a mean estimated home range of  $34.2 \pm 17.84$  ha (range: 0.12–  
288 234.0 ha; Fig. 3). Invasive vegetation sites had a mean 95% point estimate of  $35.85 \pm 33.10$  (range:  
289 0.12 - 234.05 ha), whereas native vegetation sites had a mean 95% point estimate of  $32.47 \pm 16.87$   
290 (range: 1.28 - 130.50 ha). However, the median range for invasive vegetation sites was 1.11 ha,  
291 compared to 21.5 ha at sites dominated by native vegetation. The Bayesian comparison indicated a  
292 96.37% chance that AKDE home ranges (95% contour; and with the caveat of limited evidence of  
293 range residency) were smaller at the sites with invasive grass, with a mean difference of  $14.6 \pm 9.35$   
294 ha (Cr.I 95% -33.07–1.42 ha; Fig. 4A). The mean home range crossing time was  $7.95 \pm 2.39$  days for  
295 the snakes inhabiting sites with invasive vegetation compared to  $5.18 \pm 1.96$  days for those sites with  
296 native vegetation.

297  
298 Variograms for all snakes were severely impacted by the burst sampling tracking regime, with clear  
299 and repeated spikes in semi-variance uncertainty associated with the multi-day gaps (Fig. S2). Only  
300 snakes BS01 and BS02 had variograms that appeared to approach stability after peaks in semi-  
301 variance at time lags greater than 20-30 days. Stability of the other snakes' ranges was difficult to  
302 ascertain because of the artefacts resulting from the burst sampling; therefore, range AKDE area  
303 estimates should be interpreted with caution (i.e., the assumption of range residency was not met).  
304 Lack of stability was compounded by low effective sample sizes for all individuals ( $10.9 \pm 3.05$ ,  
305 range: 1.34–37.80; Table S1), justifying the use of pHREML fitting and weighted area estimates  
306 (Silva et al., 2021). The lowest (0.08 ha) and highest (713.3 ha) 95% confidence intervals associated  
307 with the home range estimates illustrate the extent of uncertainty (Table S1) and the individual  
308 variation between individual snakes.

309

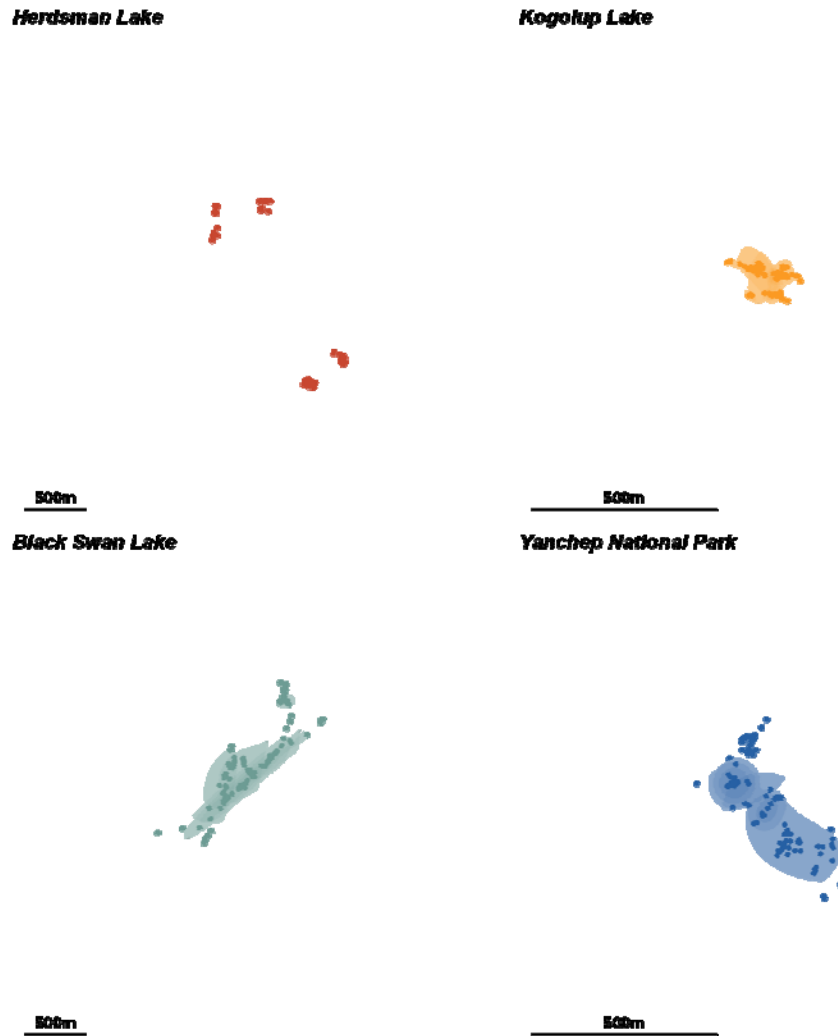

310

311

312 Fig. 3. Autocorrelated Kernel Density Estimators (AKDE) area estimates for western tiger snakes

313 (*Notechis scutatus occidentalis*) at four wetlands in the Perth metropolitan area, Western Australia.

314 Warmer colours (Herdsman Lake and Kogolup Lake) are sites dominated by invasive kikuyu grass

315 (*Cenchrus clandestinus*) and cooler colours (Black Swan Lake and Yanchep National Park) are the

316 sites with native vegetation. Each snake's home range area is represented by the 95% contour,

317 alongside the 95% confidence surrounding that contour estimate in differing levels of transparency.

318 Dots represent snake positions (raw data). The scale bar is 500 m.

319

320

321 As the stability of the snakes' range residency was uncertain (Fig. S3), we examined whether  
322 differences in potential space use are apparent using a different estimation method. Dynamic  
323 brownian bridge movement models (dBBMM; Fig. 4) provide an alternative estimate of uncertainty  
324 regarding possible areas reached by the snakes between data points. The broad window and margin  
325 sizes we selected successfully smoothed motion variance throughout the tracking period, avoiding  
326 artefact spikes in motion variance (movement capacity) resulting from the burst sampling (Fig. S4).  
327 The 95% confidence areas resulting from the dBBMMs revealed a clear difference in snake  
328 movements (i.e., areas potentially reached between recorded locations) between sites with native  
329 vegetation ( $11.68 \pm 4.80$  ha, median: 4.97, range: 0.21–30.62 ha) and invasive vegetation dominated  
330 sites ( $0.57 \pm 0.43$  ha, median: 0.08, range: 0.03–3.11 ha); snake movements at BS and Y areas (native  
331 vegetation) appeared much larger, implying greater uncertainty likely as a result of increased  
332 movement capacity detected by the models (Fig. 3; Table S1). Our Bayesian comparison reflected this  
333 difference, suggesting a 98.58% chance that space use was smaller in areas with invasive vegetation;  
334 on average  $10.04 \pm 5.65$  ha smaller (Cr.I 95% -20.52–0.14 ha; Fig. 4A).

335

336

337

338

339

340

341



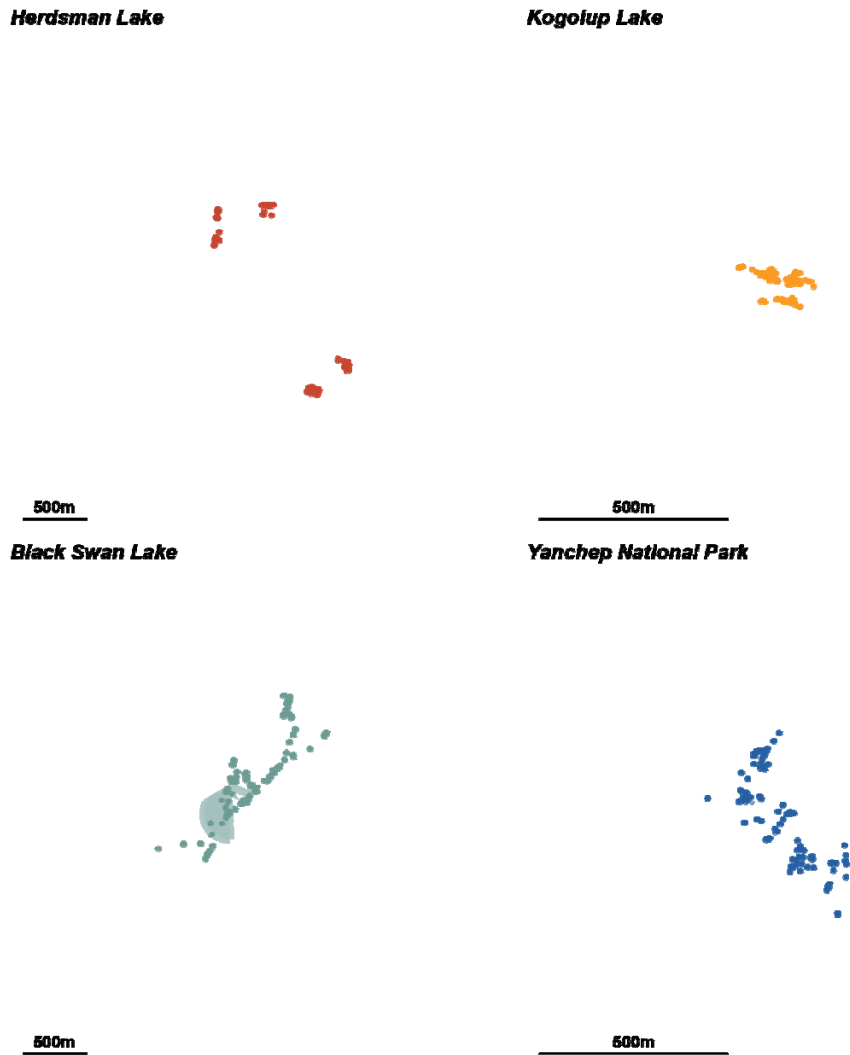

342

343 *Fig. 4.* Dynamic Brownian Bridge Movement Models (dBBMM) confidence areas at each study  
344 locale for tiger snakes (*Notechis scutatus occidentalis*) radio-tracked at four wetlands in the Perth  
345 metropolitan area, Western Australia. Dots represent tiger snake positions (raw data). Scale bar is  
346 500m, matching the scale and origin of the AKDE (Fig. 3) Warmer colours (Herdsman Lake and  
347 Kogolup Lake) are the locales with invasive grass; cooler colours (Black Swan Lake and Yanchep  
348 National Park) are the locales with native vegetation. Each snake's confidence area is represented by  
349 the 90, 95 and 99% contours in differing levels of transparency.

350

351

352

353 The Bayesian Regression Model successfully converged with all  $R^2$  values  $\sim 1$ , and trace and acf  
354 plots appeared adequate (see DOI: <https://doi.org/10.5281/zenodo.7700983>). However, a very low  
355 conditional  $R^2$  of 0.125 (Cr.I. 95% 0.065–0.213; marginal  $R^2$ : 0.02, Cr.I. 95% 1.127e-09–0.194),  
356 suggests factors other than those included in the model (binary vegetation categories or the group  
357 effects of animal, site and day) are impacting step length per hour. The mean ( $\pm$  SD) within-day step  
358 length per hour (i.e., those with a time lag of less than 24 hours) was  $3.07 \pm 1.07$  m/hour (Cr.I. 95%  
359 0.81–10.31 m/hour) at sites with invasive vegetation compared to  $6.19 \pm 2.04$  m/hour (Cr.I. 95% 1.79–  
360 20.36 m/hour; Fig. 5B) in areas with native vegetation. On average, the step lengths per hour recorded  
361 at with invasive vegetation have a 89.62% chance of being smaller than those recorded at sites with  
362 native vegetation (mean difference of  $-0.71 \pm 0.88$  m/hour, Cr.I. 95%  $-2.62$ – $-0.87$  m/hour; Fig. 5B).  
363  
364

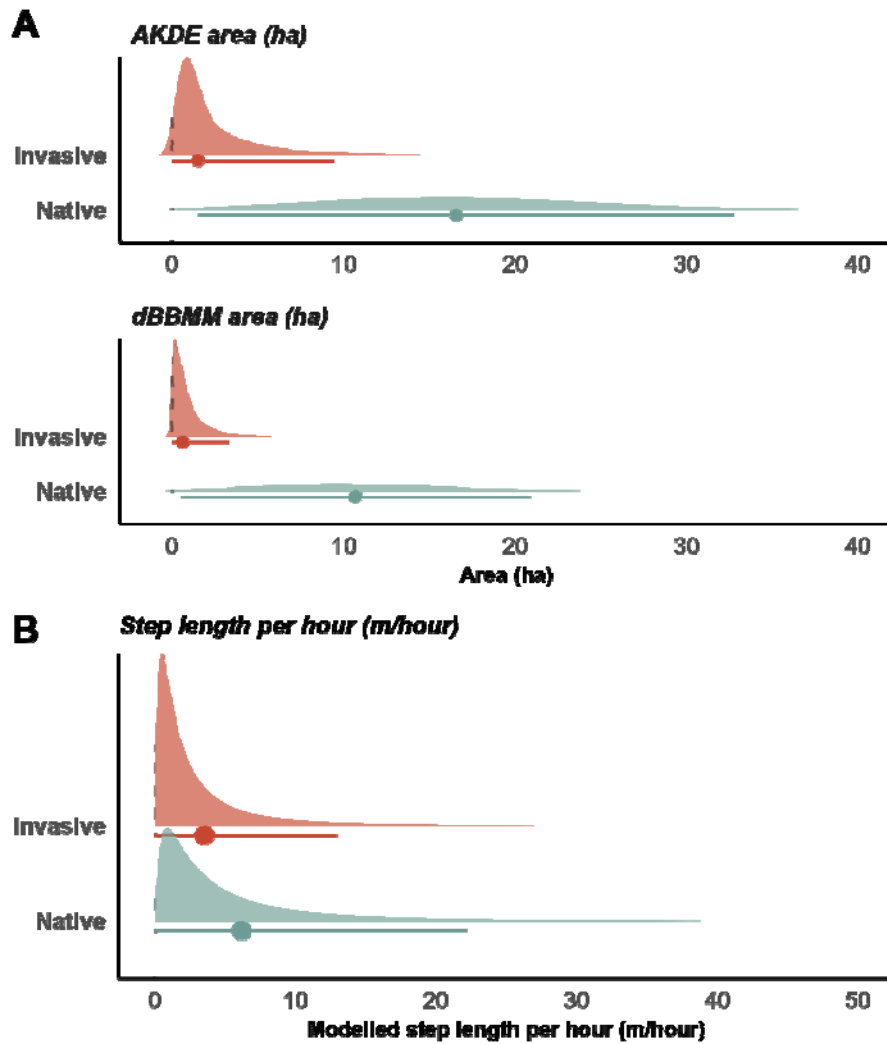

365

366 Fig. 5. Posterior distributions associated with vegetation effects on western tiger snake (*Notechis*  
367 *scutatus occidentalis*) space use and movements. Sites with invasive vegetation: Herdsman Lake and  
368 Kogolup Lake, those with predominantly native vegetation: and Yanchep National Park and Black  
369 Swan Lake. A) Posterior distribution resulting from Bayesian comparisons of space use. Space use  
370 measures used were point estimates of 95% utilisation distribution contours from autocorrelated  
371 kernel density estimators (AKDE) and the 95% occurrence distribution contours from dynamic  
372 Brownian bridge movement models (dBBMM; both in hectares). B) Posterior distribution of  
373 population effect of vegetation on within day step lengths per hour. Dots indicate point estimates, and  
374 lines indicate the 95% median HDI credible intervals.

375

376 **DISCUSSION**

377 We observed clear differences in estimates of overall space use for male tiger snakes occupying  
378 wetlands dominated by invasive kikuyu grass compared to those occupying wetlands with native  
379 vegetation, with snakes using smaller areas at sites with kikuyu. However, there was considerable  
380 variation in within-day step lengths per hour between individual snakes, resulting in substantial  
381 overlap for within-day step lengths per hour across sites.

382

383 Snakes in wetlands dominated by kikuyu grass spent most of their time within the invasive grass,  
384 covering overall smaller areas within the two month study period. A suite of factors influence intra-  
385 specific variation in home range and movement, such as habitat composition and fragmentation,  
386 resource availability, weather conditions, sex, and age (Rivrud et al. 2010; Braham et al. 2015; Mayer  
387 et al. 2019). It is not uncommon for animals in urban and other environments with high human  
388 impacts to have smaller home ranges than those living in rural or less-disturbed environments (Lowry  
389 et al. 2013; Tucker et al. 2018). For mammalian species persisting in areas with both high and low  
390 human impact these reduced movements can result from both movement barriers and from increased  
391 resource availability (Tucker et al. 2018) with smaller home ranges and shorter movements associated  
392 with better habitat quality (Fustec et al. 2001; Bjørneraas et al. 2012). The king cobra (*Ophiophagus*  
393 *hannah*), another elapid snake species, had reduced movement in human altered landscapes being  
394 restrained to small areas of relatively natural remnant vegetation in agricultural environments  
395 compared with protected forest areas (Marshall et al. 2020). For cobras, movement barriers appear  
396 responsible for reduced movements in agricultural landscapes. Similarly, Maddalena et al. (2020)  
397 reported that home ranges of milksnakes (*Lampropeltis triangulum*) were smaller in urban parks  
398 compared to a more natural study site, likely due to fragmentation by roads and differences in habitat  
399 composition.

400

401 For tiger snakes, sites dominated by kikuyu and native vegetation did not differ substantially with  
402 respect to prey availability, temperature or predation pressure for tiger snakes (Cornelis et al. 2022),  
403 so we suspect these factors are not directly driving the observed differences in tiger snake movements.

404 The major habitat difference between the vegetation types is that kikuyu forms more structurally  
405 dense cover, completely covering the ground (compared to patches of bare ground which occur within  
406 native vegetation). We suspect this structural difference allows tiger snakes to move vertically  
407 between basking locations on top of kikuyu and shelter sites at the base, rather than having to travel  
408 horizontally along the ground to open basking areas in sites dominated by native vegetation (JC &  
409 DCL pers obs). Consequently, tiger snakes living in kikuyu-dominated habitats have smaller home  
410 ranges than those in native vegetation reflecting their predominantly vertical rather than horizontal  
411 movements due to increased density of resources in the form of basking and shelter sites. For some  
412 reptiles, invasive plants which provide structurally complex habitats can be important for their  
413 persistence in highly modified environments. Garden et al. (2007) reported a positive association  
414 between native reptiles and up to 50% weed cover in urban remnant habitat fragments. For these  
415 species it is the habitat structure, rather than the plant species composition, that drives reptile  
416 persistence.

417

418 Another explanation for the smaller areas used by snakes in kikuyu-dominated habitats could be a  
419 smaller potential area for them to occupy. The two wetlands with kikuyu are surrounded by historic  
420 urbanisation and roads, especially HL, which has been subject to anthropogenic modification since the  
421 1850's (Clarke et al. 1990; Gentilli and Bekle. 1993; Kelobonye et al. 2019; Lettoof et al. 2021b).  
422 Some connectivity remains between KL and adjacent wetlands as part of the broader Beelihar Regional  
423 Park yet multiple roads are interspersed through this region which act as a habitat barrier and can lead  
424 to increased mortality (Andrews and Gibbons 2005; Lettoof et al. 2021b; Cornelis et al. 2021). Roads  
425 are well known for inhibiting movements of urban wildlife (Clark et al. 2010, Holderegger & Di  
426 Giulio 2010, Doherty et al. 2020) and this, along with habitat fragmentation, may exert selection  
427 pressure against extensive movement of snakes at HL and KL. At BS, where surrounding urbanisation  
428 is relatively recent (< 30 years) and the main road separating the lake from adjacent wetlands was  
429 only developed in 2010 (Google Earth 2021), one snake left the wetland and spent time around  
430 industrial infrastructure and another spent much of its time moving along the edge of a main road.  
431 These behaviours appear to be an attempt to reach a neighbouring southern wetland; the shorter period

432 of isolation may have been insufficient to induce a selective pressure for this population to avoid risky  
433 urban environments (Shepard et al. 2008).

434

435 Our findings add to an increased understanding of how changes in habitat composition, driven by  
436 invasive vegetation, can affect space use by animals. Our current findings suggest that management  
437 plans for urban wetlands in the Perth urban area should improve structural complexity of homogenous  
438 kikuyu habitat by planting native species to support the predators in these ecosystems (Cornelis et al.  
439 2022). However, it remains to be determined if and how this grass affects reproductive success and  
440 long-term survival of tiger snakes. For example, it is possible that apart from the apparently positive  
441 effect of the increased structural complexity of invasive grass for thermoregulatory behaviour,  
442 changes in vegetation structure might negatively impact the foraging efficiency of tiger snakes. In  
443 other systems, increased structural complexity of the habitat decreases predation efficiency (e.g.  
444 Warfe & Barmuta 2004), although for snakes increased vegetation complexity can improve predation  
445 efficiency (e.g. Koenig et al. 2007; Somsiri et al. 2020). Moreover, our study was restricted to a  
446 comparatively short period and to mature males. Longer-term studies including both sexes could  
447 investigate the role of habitat homogenisation via invasive vegetation across seasons and depending  
448 on sex, as females might have different habitat requirements than males, especially during the  
449 reproductive season (Brown et al. 2002).

450

#### 451 **DATA ACCESSIBILITY**

452 Data used in this study is available on Zenodo (DOI: <https://doi.org/10.5281/zenodo.7700983>). The  
453 Zenodo repository also includes all R scripts used to run analyses and generate figures.

454

#### 455 **ACKNOWLEDGEMENTS**

456 We thank Katrina Wood for volunteering her time to provide advice and practical training concerning  
457 snake surgeries, Aleesha Turner for volunteering her time to assist with surgeries, husbandry and  
458 tracking of tiger snakes for this project, and Bill Bateman for allowing us to use his lab for snake  
459 husbandry. We also pay respects to the traditional owners of the land, the Whadjuk-Noongar people,

460 where this research was conducted. The use of wild animals for this project followed the Australian  
461 Code of Practice for the care and use of animals for scientific purposes and was approved by the  
462 Curtin University Animal Ethics committee (ARE2020-06). We also thank the staff at the Department  
463 of Biodiversity Conservation and Attractions and the staff at Regional Parks for allowing us access to  
464 the study sites and issuing the required permit (FO25000294-2).

465

#### 466 **FUNDING**

467 Jari Cornelis received funding from Curtin University for this research in the form of a higher degree  
468 by research student consumables budget.

469

#### 470 **AUTHOR CONTRIBUTIONS**

471 All authors contributed to the study conception and design. Surgical procedures were performed by  
472 Christine Cooper and Jari Cornelis. Material preparation and data collection were performed by Jari  
473 Cornelis and Damian Lettoof. Data analysis was performed by Benjamin Marshall. The first draft of  
474 the manuscript was written by Jari Cornelis and Benjamin Marshall and all authors commented and  
475 contributed to subsequent versions of the manuscript. VHF transmitters were provided by Martin  
476 Mayer.

477

#### 478 **COMPETING INTERESTS**

479 The authors have no relevant financial or non-financial interests to disclose

480

#### 481 **LITERATURE CITED**

482 Abom, R., Vogler, W., & Schwarzkopf, L. (2015). Mechanisms of the impact of a weed (grader grass,  
483 *Themeda quadrivalvis*) on reptile assemblage structure in a tropical savannah. *Biological*  
484 *Conservation*, 191, 75-82.

485 Alston JM, Fleming CH, Noonan MJ, Tucker MA, Silva I, Folta C, Akre TSB, Ali AH, Belant JL,  
486 Beyer D, Blaum N, Böhning-Gaese K, de Paula RC, Dekker J, Drescher-Lehman J, Farwig N,  
487 Fichtel C, Fischer C, Ford AT, Janssen R, Jeltsch F, Kappeler PM, LaPoint SD, Markham AC,

488 Medici EP, Morato RG, Nathan R, Olson KA, Patterson BD, Petroelje TR, Ramalho EE,  
489 Rösner S, Oliveira Santos LG, Schabo DG, Selva N, Sergiel A, Spiegel O, Ullmann W, Zieba  
490 F, Zwijacz-Kozica T, Wittemyer G, Fagan WF, Müller T, Calabrese JM. 2022. Clarifying space  
491 use concepts in ecology: range vs. occurrence distributions. bioRxiv. DOI:  
492 10.1101/2022.09.29.509951.

493 Andrews, K. M., & Gibbons, J. W. (2005). How do highways influence snake movement? Behavioral  
494 responses to roads and vehicles. *Copeia*, 2005(4), 772-782.

495 Averill-Murray RC, Fleming CH, Riedle JD. Reptile Home Ranges Revisited: a Case Study of Space  
496 Use of Sonoran Desert Tortoises (*Gopherus morafkai*). *Herpetological Conservation and*  
497 *Biology*:19.

498 Bivand, Roger S., Edzer Pebesma, and Virgilio Gomez-Rubio. 2013. Applied Spatial Data Analysis  
499 with R, Second Edition. Springer, NY. <https://asdar-book.org/>.

500 Bivand, Roger, and Colin Rundel. 2021. Rgeos: Interface to Geometry Engine - Open Source  
501 ('GEOS'). <https://CRAN.R-project.org/package=rgeos>.

502 Bjørneraas, K., Herfindal, I., Solberg, E. J., Sæther, B. E., van Moorter, B., & Rolandsen, C. M.  
503 (2012). Habitat quality influences population distribution, individual space use and functional  
504 responses in habitat selection by a large herbivore. *Oecologia*, 168(1), 231-243.

505 Boback SM, Nafus MG, Yackel Adams AA, Reed RN. 2020. Use of visual surveys and  
506 radiotelemetry reveals sources of detection bias for a cryptic snake at low densities. *Ecosphere*  
507 11. DOI: 10.1002/ecs2.3000.

508 Bonnet, X., Bradshaw, D., Shine, R., & Pearson, D. (1999). Why do snakes have eyes? The  
509 (non-) effect of blindness in island tiger snakes (*Notechis scutatus*). *Behavioral Ecology and*  
510 *Sociobiology*, 46(4), 267-272.

511 Bradshaw, C. J., Bowman, D. M., Bond, N. R., Murphy, B. P., Moore, A. D., Fordham, D. A.,  
512 ... & Specht, A. (2013). Brave new green world—consequences of a carbon economy for the  
513 conservation of Australian biodiversity. *Biological Conservation*, 161, 71-90.

514 Braham, M., Miller, T., Duerr, A. E., Lanzone, M., Fesnock, A., LaPre, L., ... & Katzner, T.  
515 (2015). Home in the heat: dramatic seasonal variation in home range of desert golden eagles



- 516 informs management for renewable energy development. *Biological Conservation*, 186, 225-  
517 232.
- 518 Braithwaite, R. W., W. Lonsdale, and J. Estbergs. 1989. Alien vegetation and native biota in  
519 tropical Australia: the impact of *Mimosa pigra*. *Biological Conservation* 48:189-210.
- 520 Brown, G.P., Shine, R., Madsen, T., 2002. Responses of three sympatric snake species to  
521 tropical seasonality in northern Australia. *Journal of Tropical Ecology* 18, 549-568.
- 522 Bürkner, Paul-Christian. 2017. “brms: An R Package for Bayesian Multilevel Models Using Stan.”  
523 *Journal of Statistical Software* 80 (1): 1–28. <https://doi.org/10.18637/jss.v080.i01>.
- 524 ———. 2018. “Advanced Bayesian Multilevel Modeling with the R Package brms.” *The R Journal*  
525 10 (1): 395–411. <https://doi.org/10.32614/RJ-2018-017>.
- 526 ———. 2021. “Bayesian Item Response Modeling in R with brms and Stan.” *Journal of Statistical*  
527 *Software* 100 (5): 1–54. <https://doi.org/10.18637/jss.v100.i05>.
- 528 Bürkner, Paul-Christian. 2018. “Advanced Bayesian Multilevel Modeling with the R Package brms.”  
529 *The R Journal* 10 (1): 395–411. <https://doi.org/10.32614/RJ-2018-017>.
- 530 Burt, W. H. (1943). Territoriality and home range concepts as applied to mammals. *Journal of*  
531 *mammalogy*, 24(3), 346-352.
- 532 Calabrese JM, Fleming CH, Gurarie E. 2016. Ctm: an R Package for Analyzing Animal Relocation  
533 Data As a Continuous-Time Stochastic Process. *Methods in Ecology and Evolution* 7:1124–  
534 1132. DOI: 10.1111/2041-210X.12559.
- 535 Carfagno, G. L. F., & Weatherhead, P. J. (2008). Energetics and Space Use: Intraspecific and  
536 Interspecific Comparisons of Movements and Home Ranges of Two Colubrid Snakes. In  
537 *Source: Journal of Animal Ecology* (Vol. 77, Issue 2).
- 538 Ceradini, J. P., & Chalfoun, A. D. (2017). Species’ traits help predict small mammal responses to  
539 habitat homogenization by an invasive grass: *Ecological Applications*, 27(5), 1451–1465.  
540 <https://doi.org/10.1002/eap.1535>
- 541 Clark, R. W., Brown, W. S., Stechert, R., & Zamudio, K. R. (2010). Roads, interrupted dispersal, and  
542 genetic diversity in timber rattlesnakes. *Conservation Biology*, 24(4), 1059-1069.

- 543 Clarke, K. Davis, J. Murray, F. Herdsman Lake water quality study. Perth, Australia: Murdoch  
544 University, 1990.
- 545 Clavel, J., Julliard, R., & Devictor, V. (2011). Worldwide decline of specialist species: toward a  
546 global functional homogenization?. *Frontiers in Ecology and the Environment*, 9(4), 222-228.
- 547 Cornelis, J. (2021). *The Serpent in the Garden of Weeden: A Comparison of Western Tiger Snake*  
548 *(Notechis scutatus occidentalis) Habitat Quality and Thermal Ecology in Native and Invasive*  
549 *Vegetation* (MPhil Dissertation, Curtin University, Perth Western Australia).
- 550 Cornelis, J., Parkin, T., & Bateman, P. W. (2021). Killing them softly: a review on snake translocation  
551 and an Australian case study. *Herpetological Journal*, 31(3).
- 552 Cornelis, J., von Takach, B., Cooper, C. E., Vos, J., Bateman, P. W., & Lettoof, D. C. (2022).  
553 Quantifying the impacts of an invasive weed on habitat quality and prey availability for tiger  
554 snakes (*Notechis scutatus*) in urban wetlands. *bioRxiv*.
- 555 Crane M, Silva I, Marshall BM, Strine CT. 2021. Lots of movement, little progress: a review of  
556 reptile home range literature. PeerJ 9:e11742. DOI: 10.7717/peerj.11742.
- 557 Davis, J. A., & Froend, R. (1999). Loss and degradation of wetlands in southwestern Australia:  
558 underlying causes, consequences and solutions. *Wetlands Ecology and Management*, 7(1), 13-  
559 23.
- 560 Decorps, Jean Pierre. 2021. GADMTools: Easy Use of 'GADM' Maps. [https://CRAN.R-](https://CRAN.R-project.org/package=GADMTools)  
561 [project.org/package=GADMTools](https://CRAN.R-project.org/package=GADMTools).
- 562 Devictor, V., R. Julliard, J. Clavel, F. Jiguet, A. Lee, and D. Couvet. 2008. Functional Biotic  
563 homogenization of bird communities in disturbed landscapes. *Global Ecology and*  
564 *Biogeography* 17:252-261.
- 565 Doherty, T.S., S. Balouch, K. Bell, T.J. Burns, A. Feldman, C. Fist, T.F. Garvey, T.S. Jessop, S.  
566 Meiri, and D.A. Driscoll. 2020. Reptile responses to anthropogenic habitat modification: A  
567 global meta-analysis. *Global Ecology and Biogeography* 29: 1265-79.  
568 <https://doi.org/10.1111/geb.13091>.

- 569 Doherty, T. S., & Driscoll, D. A. (2018). Coupling movement and landscape ecology for animal  
570 conservation in production landscapes. *Proceedings of the Royal Society B: Biological*  
571 *Sciences*, 285(1870), 20172272.
- 572 Doherty, T. S., Fist, C. N., & Driscoll, D. A. (2019). Animal movement varies with resource  
573 availability, landscape configuration and body size: a conceptual model and empirical example.  
574 *Landscape ecology*, 34(3), 603-614.
- 575 Douglas, M. M., S. A. Setterfield, R. A. O'Connor, K. Ferdinands, N. A. Rossiter, K. J. Brooks, B.  
576 Ryan, and C. Parr. 2006. Different weeds, different habitats, same effects: exotic grass invasion  
577 in tropical woodlands and wetlands. Pages 811-814 in Proceedings of the 15th Australian  
578 Weeds Conference. Weed Management Society of South Australia Adelaide, South  
579 Australia, Australia.
- 580 Dunnington, Dewey. 2022. Ggspatial: Spatial Data Framework for Ggplot2. [https://CRAN.R-](https://CRAN.R-project.org/package=ggspatial)  
581 [project.org/package=ggspatial](https://CRAN.R-project.org/package=ggspatial).
- 582 Faulkner, S. 2004. Urbanization impacts on the structure and function of forested wetlands.  
583 *Urban Ecosystems* 7:89-106.
- 584 Fleming CH, Calabrese JM. 2017. A new kernel density estimator for accurate home-range and  
585 species-range area estimation. *Methods in Ecology and Evolution* 8:571–579. DOI:  
586 10.1111/2041-210X.12673.
- 587 Fleming, Christen H., and Justin M. Calabrese. 2021. Ctmm: Continuous-Time Movement Modeling.  
588 <https://CRAN.R-project.org/package=ctmm>.
- 589 Fleming CH, Sheldon D, Fagan WF, Leimgruber P, Mueller T, Nandintsetseg D, Noonan MJ, Olson  
590 KA, Setyawan E, Sianipar A, Calabrese JM. 2018. Correcting for missing and irregular data in  
591 home-range estimation. *Ecological Applications* 28:1003–1010. DOI: 10.1002/eap.1704.
- 592 Fraser KC, Davies KT, Davy CM, Ford AT, Flockhart DTT, Martins EG. 2018. Tracking the  
593 conservation promise of movement ecology. *Frontiers in Ecology and Evolution* 6:150. DOI:  
594 10.3389/FEVO.2018.00150.

- 595 Fustec, J., Lodé, T., Le Jacques, D., & Cormier, J. P. (2001). Colonization, riparian habitat selection  
596 and home range size in a reintroduced population of European beavers in the Loire. *Freshwater*  
597 *Biology*, 46(10), 1361-1371.
- 598 Gabry, Jonah, and Tristan Mahr. 2022. "Bayesplot: Plotting for Bayesian Models." [https://mc-](https://mc-stan.org/bayesplot/)  
599 [stan.org/bayesplot/](https://mc-stan.org/bayesplot/).
- 600 Gabry, Jonah, Daniel Simpson, Aki Vehtari, Michael Betancourt, and Andrew Gelman. 2019.  
601 "Visualization in Bayesian Workflow." *J. R. Stat. Soc. A* 182: 389–402.  
602 <https://doi.org/10.1111/rssa.12378>.
- 603 Garden, J. G., McAlpine, C. A., Possingham, H. P., & Jones, D. N. (2007). Habitat structure is more  
604 important than vegetation composition for local-level management of native terrestrial reptile  
605 and small mammal species living in urban remnants: A case study from Brisbane, Australia.  
606 *Austral Ecology*, 32(6), 669–685. <https://doi.org/10.1111/j.1442-9993.2007.01750.x>
- 607 Garden, J. G., McAlpine, C. A., & Possingham, H. P. (2010). Multi-scaled habitat considerations for  
608 conserving urban biodiversity: native reptiles and small mammals in Brisbane, Australia.  
609 *Landscape Ecology*, 25(7), 1013-1028.
- 610 Gentilli, J. Bekle, H. History of the Perth lakes. *Early Days: Journal of the Royal Western Australian*  
611 *Historical Society*.1993; 10(5): 442.
- 612 Gonzalez, F. L. (2009). *Socio-environmental Dynamics of Biological Invasions: The Case of Kikuyu*  
613 *Grass (Pennisetum Clandestinum) in the Cotahuasi Valley, Southern Peru*(Doctoral  
614 dissertation, University of Wisconsin--Madison).
- 615 Grella, C., Renshaw, A., & Wright, I. A. (2018). Invasive weeds in urban riparian zones: the influence  
616 of catchment imperviousness and soil chemistry across an urbanization gradient. *Urban*  
617 *Ecosystems*, 21, 505-517.
- 618 Google Earth Pro 9.144.0.2. (September, 2021). Mandurah region, WA Australia 32° 28' 55"S, 115°  
619 46' 19"E. <[https://earth.google.com/web/@-](https://earth.google.com/web/@-32.4821157,115.77218624,4.1899442a,4566.50513958d,35y,2.7962h,0t,0r?utm_source=earth7&utm_campaign=vine&hl=en)  
620 [32.4821157,115.77218624,4.1899442a,4566.50513958d,35y,2.7962h,0t,0r?utm\\_source=earth7](https://earth.google.com/web/@-32.4821157,115.77218624,4.1899442a,4566.50513958d,35y,2.7962h,0t,0r?utm_source=earth7&utm_campaign=vine&hl=en)  
621 [&utm\\_campaign=vine&hl=en](https://earth.google.com/web/@-32.4821157,115.77218624,4.1899442a,4566.50513958d,35y,2.7962h,0t,0r?utm_source=earth7&utm_campaign=vine&hl=en)> (Accessed September, 2021)

- 622 Hacking, J., Abom, R., & Schwarzkopf, L. (2014). Why do lizards avoid weeds? *Biological*  
623 *Invasions*, 16(4), 935–947. <https://doi.org/10.1007/s10530-013-0551-7>
- 624 Habel, J. C., Teucher, M., Rödder, D., Bleicher, M. T., Dieckow, C., Wiese, A., & Fischer, C. (2016).  
625 Kenyan endemic bird species at home in novel ecosystem. *Ecology and evolution*, 6(8), 2494-  
626 2505.
- 627 Hodgkison, S., Hero, J. M., & Warnken, J. (2007). The efficacy of small-scale conservation efforts, as  
628 assessed on Australian golf courses. *Biological Conservation*, 135(4), 576-586.
- 629 Holderegger, Rolf, and Manuela Di Giulio. "The genetic effects of roads: a review of empirical  
630 evidence." *Basic and Applied Ecology* 11.6 (2010): 522-531.
- 631 Kassambara, Alboukadel. 2020. Ggpubr: 'Ggplot2' Based Publication Ready Plots. [https://CRAN.R-](https://CRAN.R-project.org/package=ggpubr)  
632 [project.org/package=ggpubr](https://CRAN.R-project.org/package=ggpubr).
- 633 Kay, Matthew. 2022. tidybayes: Tidy Data and Geoms for Bayesian Models.  
634 <https://doi.org/10.5281/zenodo.1308151>.
- 635 Kelobonye, K., Xia, J. C., Swapan, M. S. H., McCarney, G., & Zhou, H. (2019). Drivers of change in  
636 urban growth patterns: A transport perspective from Perth, Western Australia. *Urban Science*,  
637 3(2), 40.
- 638 Koenig, S. E., Wunderle, J. R., & Enkerlin-Hoeflich, E. C. (2007). Vines and canopy contact: a route  
639 for snake predation on parrot nests. *Bird Conservation International*, 17; 79-91.
- 640 Kranstauber, B., Kays, R., LaPoint, S. D., Wikelski, M., & Safi, K. (2012). A dynamic Brownian  
641 bridge movement model to estimate utilization distributions for heterogeneous animal  
642 movement. *Journal of Animal Ecology*, 81; 738-746.
- 643 Kranstauber, B., Smolla, M., Scharf, A. K., & Kranstauber, M. B. (2022). Move: Visualizing and  
644 Analyzing Animal Track Data. <https://CRAN.R-project.org/package=move>.
- 645 Lambdon, P. W., Lloret, F., & Hulme, P. E. (2008). Do non-native species invasions lead to biotic  
646 homogenization at small scales? The similarity and functional diversity of habitats compared  
647 for alien and native components of Mediterranean floras. *Diversity and Distributions*, 14; 774-  
648 785.

- 649 Lettoof, D. C., Cornelis, J., Jolly, C. J., Aubret, F., Gagnon, M. M., Hyndman, T. H., ... & Bateman,  
650 P. W. (2022). Metal (loid) pollution, not urbanisation nor parasites predicts low body condition  
651 in a wetland bioindicator snake. *Environmental Pollution*, 295, 118674.
- 652 Lettoof, D. C., Rankenburg, K., McDonald, B. J., Evans, N. J., Bateman, P. W., Aubret, F., &  
653 Gagnon, M. M. 2021a. Snake scales record environmental metal(loid) contamination.  
654 *Environmental Pollution*, 274. <https://doi.org/10.1016/j.envpol.2021.116547>
- 655 Lettoof, D. C., Thomson, V. A., Cornelis, J., Bateman, P. W., Aubret, F., Gagnon, M. M., & von  
656 Takach, B. 2021b. Bioindicator snake shows genomic signatures of natural and anthropogenic  
657 barriers to gene flow. *PloS one*, 16; e0259124.
- 658 Lettoof, D., von Takach, B., Bateman, P. W., Gagnon, M. M., & Aubret, F. (2020).  
659 Investigating the role of urbanisation, wetlands and climatic conditions in nematode parasitism  
660 in a large Australian elapid snake. *International Journal for Parasitology: Parasites and*  
661 *Wildlife*, 32–39. <https://doi.org/10.1016/j.ijppaw.2019.11.006>
- 662 Lindsay, E. A., & Cunningham, S. A. (2012). Effects of exotic grass invasion on spatial heterogeneity  
663 in the ground-layer of grassy woodlands. *Biological invasions*, 14(1), 203-213.
- 664 Litt, A. R., & Steidl, R. J. (2011). Interactive effects of fire and nonnative plants on small mammals in  
665 Grasslands: Effets Interactifs du Feu et des Plantes Non Indigènes sur les Petits Mammifères  
666 dans les Prairies. *Wildlife Monographs*, 176(1), 1-31.
- 667 Lowry, H., Lill, A., & Wong, B. B. (2013). Behavioural responses of wildlife to urban environments.  
668 *Biological reviews*, 88(3), 537-549.
- 669 Lüdecke, Daniel, Mattan S. Ben-Shachar, Indrajeet Patil, Philip Waggoner, and Dominique  
670 Makowski. 2021. “performance: An R Package for Assessment, Comparison and Testing of  
671 Statistical Models.” *Journal of Open Source Software* 6 (60): 3139.  
672 <https://doi.org/10.21105/joss.03139>.
- 673 Maddalena, M. P., Row, J. R., Dyson, M. E., Blouin-Demers, G., & Fedy, B. C. (2020). Movement  
674 and habitat selection of eastern milksnakes (*Lampropeltis triangulum*) at intact and fragmented  
675 sites. *Copeia*, 108(4), 847-854.

- 676 Maerz, J. C., Brown, C. J., Chapin, C. T., & Blossey, B. (2005). Can secondary compounds of an  
677 invasive plant affect larval amphibians?. *Functional Ecology*, 19(6), 970-975.
- 678 Marshall BM, Crane M, Silva I, Strine CT, Jones MD, Hodges CW, Suwanwaree P, Artchawakom T,  
679 Waengsothorn S, Goode M. 2020. No room to roam: King Cobras reduce movement in  
680 agriculture. *Movement Ecology* 8:33. DOI: 10.1186/s40462-020-00219-5.
- 681 Mayer, M., Ullmann, W., Heinrich, R., Fischer, C., Blaum, N., & Sunde, P. (2019). Seasonal effects  
682 of habitat structure and weather on the habitat selection and home range size of a mammal in  
683 agricultural landscapes. *Landscape Ecology*, 34(10), 2279-2294.
- 684 McDiarmid, R. W., Foster, M. S., Guyer, C., Chernoff, N., & Gibbons, J. W. (Eds.). (2012). *Reptile*  
685 *biodiversity: standard methods for inventory and monitoring*. Univ of California Press.
- 686 Montano Y, Marshall BM, Ward M, Silva I, Artchawakom T, Waengsothorn S, Strine C. 2021. A  
687 stable home: Autocorrelated Kernel Density Estimated home ranges of the critically endangered  
688 Elongated Tortoise. OSF Preprints. DOI: 10.31219/osf.io/ka5t6.
- 689 Morey RD, Hoekstra R, Rouder JN, Lee MD, Wagenmakers E-J. 2016. The fallacy of placing  
690 confidence in confidence intervals. *Psychonomic Bulletin & Review* 23:103–123. DOI:  
691 10.3758/s13423-015-0947-8.
- 692 Newbold, T. S. (2005). Desert horned lizard (*Phrynosoma platyrhinos*) locomotor performance: the  
693 influence of cheatgrass (*Bromus tectorum*). *The Southwestern Naturalist*, 17-23.
- 694 Noonan MJ, Tucker MA, Fleming CH, Akre T, Alberts SC, Ali AH, Altmann J, Antunes PC, Belant  
695 JL, Beyer D, Blaum N, Böhning-Gaese K, Cullen L, de Paula RC, Dekker J, Drescher-Lehman  
696 J, Farwig N, Fichtel C, Fischer C, Ford A, Goheen JR, Janssen R, Jeltsch F, Kauffman M,  
697 Kappeler PM, Koch F, LaPoint S, Catherine Markham A, Medici EP, Morato RG, Nathan R,  
698 Oliveira-Santos LGR, Olson KA, Patterson BD, Paviolo A, Ramalho EE, Roesner S, Schabo D,  
699 Selva N, Sergiel A, Xavier da Silva M, Spiegel O, Thompson P, Ullmann W, Ziñba F,  
700 Zwijacz-Kozica T, Fagan WF, Mueller T, Calabrese JM. 2019. A comprehensive analysis of  
701 autocorrelation and bias in home range estimation. *Ecological Monographs*. DOI:  
702 10.1002/ecm.1344.

703 Noonan MJ, Fleming CH, Tucker MA, Kays R, Harrison A, Crofoot MC, Abrahms B, Alberts SC, Ali  
704 AH, Altmann J, Antunes PC, Attias N, Belant JL, Beyer DE, Bidner LR, Blaum N, Boone RB,  
705 Caillaud D, Paula RC, la Torre JA, Dekker J, DePerno CS, Farhadinia M, Fennessy J, Fichtel  
706 C, Fischer C, Ford A, Goheen JR, Havmøller RW, Hirsch BT, Hurtado C, Isbell LA, Janssen R,  
707 Jeltsch F, Kaczensky P, Kaneko Y, Kappeler P, Katna A, Kauffman M, Koch F, Kulkarni A,  
708 LaPoint S, Leimgruber P, Macdonald DW, Markham AC, McMahon L, Mertes K, Moorman  
709 CE, Morato RG, Moßbrucker AM, Mourão G, O'Connor D, Oliveira Santos LGR, Pastorini J,  
710 Patterson BD, Rachlow J, Ranglack DH, Reid N, Scantlebury DM, Scott DM, Selva N, Sergiel  
711 A, Songer M, Songsasen N, Stabach JA, Stacy Dawes J, Swingen MB, Thompson JJ, Ullmann  
712 W, Vanak AT, Thaker M, Wilson JW, Yamazaki K, Yarnell RW, Zieba F, Zwijacz Kozica T,  
713 Fagan WF, Mueller T, Calabrese JM. 2020. Effects of body size on estimation of mammalian  
714 area requirements. *Conservation Biology*:cobi.13495. DOI: 10.1111/cobi.13495.

715 Pebesma, Edzer J., and Roger S. Bivand. 2005. "Classes and Methods for Spatial Data in R." *R News*  
716 5 (2): 9–13. <https://CRAN.R-project.org/doc/Rnews/>.

717 Pike KN, Blake S, Cabrera F, Gordon IJ, Schwarzkopf L. 2021. Body size, sex and high philopatry  
718 influence the use of agricultural land by Galapagos giant tortoises. *Oryx*:1–10. DOI:  
719 10.1017/S0030605320001167.

720 R Core Team. 2022. *R: A Language and Environment for Statistical Computing*. Vienna, Austria: R  
721 Foundation for Statistical Computing. <https://www.R-project.org/>.

722 Reed, H. E., T. R. Seastedt, and J. M. Blair. 2005. Ecological consequences of C4 grass  
723 invasion of a C4 grassland: a dilemma for management. *Ecological Applications* 15:1560-  
724 1569.

725 Rivrud, I. M., Loe, L. E., & Mysterud, A. (2010). How does local weather predict red deer home  
726 range size at different temporal scales?. *Journal of Animal Ecology*, 79(6), 1280-1295.

727 Rodríguez-Sánchez, Francisco, Connor P. Jackson, and Shaurita D. Hutchins. 2022. Grateful:  
728 Facilitate Citation of r Packages. <https://github.com/Pakillo/grateful>.

729 RStudio Team. 2022. *RStudio: Integrated Development Environment for r*. Boston, MA: RStudio,  
730 PBC. <http://www.rstudio.com/>.



- 731 Schirmel, J., Bundschuh, M., Entling, M. H., Kowarik, I., & Buchholz, S. (2016). Impacts of invasive  
732 plants on resident animals across ecosystems, taxa, and feeding types: a global assessment.  
733 *Global Change Biology*, 22(2), 594-603.
- 734 Shepard, D. B., Kuhns, A. R., Dreslik, M. J., & Phillips, C. A. (2008). Roads as barriers to animal  
735 movement in fragmented landscapes. *Animal conservation*, 11(4), 288-296.
- 736 Shine, R. (1977). Reproduction in Australian elapid snakes I. Testicular cycles and mating seasons.  
737 *Australian Journal of Zoology*, 25(4), 647–653. <https://doi.org/10.1071/ZO9770647>
- 738 Shine, R. (1978). Growth rates and sexual maturation in six species of Australian elapid snakes.  
739 *Herpetologica*, 73-79.
- 740 Shine, R. (1979). Activity patterns in Australian elapid snakes (Squamata: Serpentes: Elapidae).  
741 *Herpetologica*, 1-11.
- 742 Shine, R., Lemaster, M., Wall, M., Langkilde, T., & Mason, R. (2004). Why did the snake cross the  
743 road? Effects of roads on movement and location of mates by garter snakes (*Thamnophis*  
744 *sirtalis parietalis*). *Ecology and Society*, 9(1).
- 745 Silva I, Crane M, Suwanwaree P, Strine C, Goode M. 2018. Using dynamic Brownian Bridge  
746 Movement Models to identify home range size and movement patterns in king cobras. PLOS  
747 ONE 13:e0203449. DOI: 10.1371/journal.pone.0203449.
- 748 Silva, I., Crane, M., Marshall, B. M., & Strine, C. T. (2020). Reptiles on the wrong track? Moving  
749 beyond traditional estimators with dynamic Brownian Bridge Movement Models. *Movement*  
750 *ecology*, 8(1), 1-13
- 751 Silva I, Fleming CH, Noonan MJ, Alston J, Folta C, Fagan W, Calabrese JM. 2021. Autocorrelation-  
752 informed home range estimation: a review and practical guide. bioRxiv. DOI:  
753 10.32942/osf.io/23wq7.
- 754 Simpson, G., & Newsome, D. (2017). Environmental history of an urban wetland: from degraded  
755 colonial resource to nature conservation area. *Geo: Geography and Environment*, 4(1).  
756 <https://doi.org/10.1002/geo2.30>
- 757 Skultety, D., & Matthews, J. W. (2017). Urbanization and roads drive non-native plant invasion in the  
758 Chicago Metropolitan region. *Biological Invasions*, 19(9), 2553-2566.

- 759 Slowikowski, Kamil. 2021. Ggrepel: Automatically Position Non-Overlapping Text Labels  
760 with 'Ggplot2'. <https://CRAN.R-project.org/package=ggrepel>.
- 761 Smith, S. N., Jones, M. D., Marshall, B. M., Waengsothorn, S., Gale, G. A., & Strine, C. T.  
762 (2021). Native Burmese pythons exhibit site fidelity and preference for aquatic habitats in an  
763 agricultural mosaic. *Scientific reports*, 11(1), 1-13.
- 764 Somsiri, K., Gale, G. A., Pierce, A. J., Khamcha, D., & Sankamethawee, W. (2020). Habitat structure  
765 affects nest predation of the Scaly-crowned Babbler (*Malacopteron cinereum*) by macaques and  
766 snakes in a Thai-seasonal evergreen forest. *Journal of Ornithology*, 161; 389-398.
- 767 Štajerová, K., Šmilauer, P., Brůna, J., & Pyšek, P. (2017). Distribution of invasive plants in urban  
768 environment is strongly spatially structured. *Landscape ecology*, 32(3), 681-692.
- 769 Steen DA. 2010. Snakes in the grass: Secretive natural histories defy both conventional and  
770 progressive statistics. *Herpetological Conservation and Biology* 5:183–188.
- 771 Stewart, P. S., Hill, R. A., Stephens, P. A., Whittingham, M. J., & Dawson, W. (2021). Impacts of  
772 invasive plants on animal behaviour. *Ecology Letters*. <https://doi.org/10.1111/ele.13687>
- 773 Tucker, M. A., Böhning-Gaese, K., Fagan, W. F., Fryxell, J. M., Van Moorter, B., Alberts, S. C ... &  
774 Mueller, T. (2018). Moving in the Anthropocene: Global reductions in terrestrial mammalian  
775 movements. *Science*, 359; 466-469.
- 776 Valentine, L. E., Roberts, B., & Schwarzkopf, L. (2007). Mechanisms driving avoidance of non-  
777 native plants by lizards. *Journal of Applied Ecology*, 44(1), 228–237.  
778 <https://doi.org/10.1111/j.1365-2664.2006.01244.x>
- 779 Warfe, D.M., Barmuta, L.A., 2004. Habitat structural complexity mediates the foraging success of  
780 multiple predator species. *Oecologia* 141, 171-178.
- 781 Wassmer, T., Jensen, F. H., Fahlman, A., & Murray, D. L. (2020). Editorial: Ecology and Behaviour  
782 of Free-Ranging Animals Studied by Advanced Data-Logging and Tracking Techniques. In  
783 *Frontiers in Ecology and Evolution* (Vol. 8). Frontiers Media S.A.  
784 <https://doi.org/10.3389/fevo.2020.00113>
- 785 Whitaker, P. B., & Shine, R. (2000). Sources of mortality of large elapid snakes in an agricultural  
786 landscape. *Journal of Herpetology*, 121-128.

- 787 Wickham, Hadley. 2007. “Reshaping Data with the reshape Package.” *Journal of Statistical Software*  
788 21 (12): 1–20. <http://www.jstatsoft.org/v21/i12/>.
- 789 ———. 2016. *Ggplot2: Elegant Graphics for Data Analysis*. Springer-Verlag New York.  
790 <https://ggplot2.tidyverse.org>.
- 791 Wickham, Hadley, Mara Averick, Jennifer Bryan, Winston Chang, Lucy D’Agostino McGowan,  
792 Romain François, Garrett Golemund, et al. 2019. “Welcome to the tidyverse.” *Journal of Open*  
793 *Source Software* 4 (43): 1686. <https://doi.org/10.21105/joss.01686>.
- 794 Wilke, Claus O. 2021. Ggridges: Ridgeline Plots in ‘Ggplot2’. [https://CRAN.R-](https://CRAN.R-project.org/package=ggridges)  
795 [project.org/package=ggridges](https://CRAN.R-project.org/package=ggridges).
- 796 Wilson, A. D. M., Wikelski, M., Wilson, R. P., & Cooke, S. J. (2015). Utility of biological sensor tags  
797 in animal conservation. In *Conservation Biology* (Vol. 29, Issue 4, pp. 1065–1075).  
798 <https://doi.org/10.1111/cobi.12486>
